# Supplementary material
Source: Research Square preprint supplement (doi:10.21203/rs.3.rs-9270723/v1)
Supplement: Supplementary file 1 [file 825865c43a1f7fcf53dcbe73.docx]

## Supplementary Analysis – Intercoder reliability

As described in the methods section, we performed simultaneous independent coding to “train” coders for the survey. Additionally, we check the intercoder reliability post-training in two reliability experiments:

On two occasions, coders or a group of coders independently coded the same study, making notes on each score. These scores were compared prior to the final consensus meeting to ensure that results across the study were in general agreement. We summarize the results of these two reliability experiments below.

## Experiment 1 – Paper 1

Anonymous study 1 was coded independently by authors JWB and KHR. The final scores are shown in Supplementary Table 1.

**Supplementary Table 1.** Intercoder reliability experiment for paper id 1

| **Code** | L1.1 | L1.2 | L1.3 | L1.4 | L2 | L3.1 | L3.4 | L3.2 | L3.3 | L4.1 | L4.2 | | L4.3 | L4.4 | L4.5 |
| --- | --- | --- | --- | --- | --- | --- | --- | --- | --- | --- | --- | --- | --- | --- | --- |
| **JWB** | 0 | 0 | 0 | 0 | 0 | 0 | 0 | 0 | 0 | 0 | 0 | | 1 | 1 | 0 |
| **KHR** | 0 | 0 | 0 | 0 | 0 | 0 | 0.5 | 0 | 0 | 0 | 0 | | 1 | 1 | 0 |
|  |  |  |  |  |  |  |  |  |  |  |  |

The scores two coders had a Cohen Kappa value of 0.77 and a Pearson correlation of 0.9. The main disagreement was a score of 0.5 given by KHR for “geographic leakage”, where JWB gave a score of 0. While KHR was uncertain whether geographic leakage could be an issue because the data came from a single country, JWB found that the hypothesis and discussion of the study explicitly did not aim to generalize beyond the country of interest. Ultimately, JWB’s scores were used in the final results.

## Experiment 2 – Paper 15

Anonymous study 15 was coded independently by two groups: JKH, NR, and BH as group A, and JWB and KHR as group B. The final scores are shown in Supplementary Table 2.

**Supplementary Table 2.** Intercoder reliability experiment for paper id 15

| **Code** | L1.1 | L1.2 | L1.3 | L1.4 | L2 | L3.1 | L3.4 | L3.2 | L3.3 | L4.1 | L4.2 | L4.3 | L4.4 | L4.5 |
| --- | --- | --- | --- | --- | --- | --- | --- | --- | --- | --- | --- | --- | --- | --- |
| **G: A** | 0 | 0 | 0 | 0 | 0 | 0 | 0.5 | 0 | 0 | 1 | 0 | 1 | 0 | 0 |
| **G: B** | 0 | 0 | 0 | 0 | 0 | 0.5 | 0 | 0 | 0 | 1 | 1 | 1 | 0 | 0 |
|  |  |  |  |  |  |  |  |  |  |  |  |  |  |  |

The scores for the two groups had a Cohen Kappa value of 0.47 and a Pearson correlation of 0.7. The main disagreements came in uncertainty regarding possible temporal or geographic leakage. While neither group fond that there was evidence of either forms of leakage in the paper, each individually were unclear if there was a potential for the leakage based on the text. Both groups eventually concluded that geographic leakage was not of concern because of a generalization test that the authors performed on two regions beyond those that the training data originated from. Without these 0.5 disagreements, the Cohen Kappa value would be 0.76. The other disagreement occured with L4.2, regarding hyperparameters. While the authors of the study stated the hyperparameter ranges they used in text, they did not state the final hyperparameter values used in the model that was used to generate results. Group A missed this error, while Group B flagged it. Ultimately, Group B’s scores were used in the final results.
