# Supplementary material
Source: Research Square preprint supplement (doi:10.21203/rs.3.rs-9270723/v1)
Supplement: Supplementary file 2 [file d1bf85c218fb82262345b34e.docx]

**Reference document – reproducibility error ontology**

## Purpose

This document adapts the definitions/types of reproducibility errors from Kapoor & Narayanan (2023) (see Figure 2 in main text) for papers applying machine learning to industrial ecology research. Below, we explain each best practice error, how they are coded, and give examples of how they appear in research studies.

## An analogy of errors: the miseducation of MeL

Consider the following analogy for understanding reproducibility errors in machine learning science. MeL is a student taking a class called ‘AI101: Weather Prediction’. MeL attends lectures all semester, learning about different weather patterns and how to predict them (fitting model to training data). At the end of the semester, MeL takes a final exam on weather prediction (running the fit model on test data). MeL receives some grade on the final exam, obtains their diploma, and then goes out into the real world to start their career as a professional weather predictor (use cases and generalization).

MeL’s education as a weather predictor can fail two ways. First, MeL could get access to an answer key for the final exam during the semester. This is analogous to most data leakage errors. MeL is gaining information they should not have when learning to predict the weather. MeL might perform well on the final exam, but fail when they start their career and try to answer weather prediction questions that they never properly learned during their degree. Second, the syllabus used to train MeL as a weather predictor might be lost. This is analogous to issues of transparency and computational reproducibility. MeL might have been trained well, but it is impossible to verify that their diploma is valid proof that they are a professional weather predictor, because key methodological details are not available

## L1 – Lack of clean separation of training and testing data

This category of best practice error arises from initial processing of the data, before any model is chosen.

**L1.1 No test set**

**Description**: data scientists evaluate supervised machine learning models by seeing how well they predict results on out-of-sample data (i.e. data not seen when fitting the model). A trained model needs to be evaluated on some hold-out set of data that was not seen by the model during training (the ‘test set’). If there is no test set, then metrics are describing what the model already ‘knows’, which leads to over optimistic results.

**Example:** Riley wants to create a model to predict whether it will rain tomorrow. Riley trains the model using weather data for all of 2025. Riley sees that the model can predict whether it will rain the next day with a F1 score of 0.9 on the dataset. However, when they go to predict rainfall tomorrow on new, out-of-sample data, the F1 score falls to 0.7. Riley should have split the 2025 dataset into two parts: one to train the model (e.g. data from Jan-Sept), and second to test the performance of the model after it has been trained (e.g. data from Oct-Dec).

**Scoring in studies**: in the methods section, we look for whether authors mention a train/test split. E.g. a quote such as “we used an 80/20 train-test-split”, meaning 20% of the data was held out for testing at the end. Authors may also include training and testing data in supplementary information. Note that if this error receives a score of 0, then the remaining *L1* errors also receive a score of zero because no test set is ever created.

0.0 – authors include a quote describing split.

0.5 – authors are unclear what the size of the hold-out test set is or if it exists (e.g. size of split).

1.0 – authors do describe a test set, calculate test metrics on training data in results.

**L1.2 Pre-processing before splitting training and test set**

**Description:** leakage can happen if authors manipulate or pre-process the data before splitting their training and testing sets in such a way that the training set gains information about the test set.

**Example:** there is missing data in the weather dataset for 2025. Riley decides to fill these missing values with the median of the given parameter (e.g. if rainfall data is missing for a day, it is filled with the median rainfall across all days). However, Riley did not split their data into a training and testing set before filling this missing data. The median includes test-set values, giving the training set information about the test set. Riley should have split the data first, and then filled the missing data using the independent means of both sets. Other problematic pre-processing includes oversampling and normalizing before splitting the data.

**Scoring in studies**: In the methods, we check whether authors explicitly state that they filled data before or after splitting the data. Some studies will explicitly say “we did X to the data, and then split into an 80/20 train-test set”. Other studies are not as clear. Sometimes, pre-processing steps are explained out in a figure.

1. – authors are clear in the text or in a figure that problematic pre-processing was done after splitting data.

0.5 – authors description of pre-processing makes it unclear if the test set is contaminated.

1.0 – authors describe problematic pre-processing before splitting data.

**L1.3 Feature selection on training and set**

**Description**: similar to pre-processing before splitting the data, authors might perform exploratory data analysis and choose features using the entire dataset. This induces data leakage – the model is built using information from the test set.

**Example:** Riley calculates the correlation of features with rainfall across the entire 2025 weather dataset. They find that peak temperature is correlated with whether it will rain. Riley decides to use peak temperature as an input feature in *X*. However, peak temperature is only predictive in a couple months at the end of the year (in the test set). If Riley had split the data into training and test sets, they would have seen that this variable is not as generalizable as it seems.

**Scoring in studies**: We check whether authors explicitly state that they split the data before choosing features using a method like cross-validation on just the training set. This error is difficult to fully confirm, as it is impossible to independently determine whether researchers performed problematic exploratory data analysis (EDA) outside of their described process. In some cases, authors might build a model with a priori features in mind. This does not induce leakage unless features are added or discarded from the model using information from the test set.

0.0 – authors describe a clear pipeline in which feature are selected after splitting.

0.5 – authors are unclear when features are selected.

1.0 – authors describe analysis, cross validation, or choosing features before splitting data.

**L1.4 Duplicates across training and test set**

**Description**: duplicate datapoints or sources of data are included in both the training and testing sets. This can happen when datasets use multiple samples from the same person/object/day, or fill missing values using the max/min/mode.

**Example:** The 2025 weather dataset erroneously contains multiple readings from the same day, and Riley forgets to remove the non-unique readings before training the model.

**Scoring in studies**: This error is difficult to identify without access to the original training and testing data. We check how the authors describe their process; there might be a systematic error that could cause these sorts of duplicates (e.g. Monte Carlo sampling from a discrete distribution to create the dataset).

0.0 – authors do not describe a process which could give rise to duplicates.

0.5 – authors are unclear about data generation process.

1.0 – there are obvious duplicates across the training or test set (e.g. if no split is ever performed).

## L2 – Illegitimate features

This category of best practice error arises from the choice of features used to predict variables. If the feature would not be legitimately available upon actual deployment or re-creation of the model, then there is a reproducibility issue. This error is very field-dependent. A good question for describing the error is: “what types of variables can actually predict what the authors are trying to predict?”. If variables are used which are not actually predictive, or would not actually be available for the model to use in a real-world scenario, then the best practice is not being met.

**Example:** Kapoor & Narayanan give the example of a model using the use of anti-hypertensive drugs as a predictor for whether a patient has hypertension. This feature would be illegitimate for the use case of the model – new patients have not yet been diagnosed with hypertension or be on anti-hypertensive drugs. Continuing our example above, Riley is using the 2025 weather dataset to predict if it is going to rain tomorrow. One of the features fed into the model is the peak temperature tomorrow. While this may correlate with rainfall, in the real world, the model making a prediction today will not know the peak temperature tomorrow. This would be an ‘illegitimate feature’.

**Scoring in studies**: We review the features proposed by the authors. We ask – if this model were deployed in practice, would these features be available? Would they make sense to plug into a machine learning model, or would they make the prediction trivial (e.g. if a patient is already on statins, we don’t need to predict whether they have hyper-tension or not).

0.0 – authors propose legitimate features.

0.5 – authors propose features which may not be legitimate in some cases, and more info is needed.

1.0 – authors propose illegitimate features.

## L3 – Test-set is not drawn from the distribution of scientific interest

This category of best practice error arises when the test set differs from “the scientific claims [being] made”. In other words, the test set used to measure performance does not align with the hypothesis and scope being proposed by the authors. If future work were to try to use the model to answer the proposed hypothesis, the results would not be reproducible.

**L3.1 Temporal leakage**

**Description**: a model is being used to make predictions about the future, but the test set includes data from before or during the time period of the training set. The model therefore has information about ‘the future’, from its perspective.

**Example:** Riley’s predictions of future rainfall should not include data from during or before the training set timeline. Also, if Riley is trying to predict rainfall over the next week, then the evaluation of this model should be on an entire week worth of data (7-days ahead). Giving metrics on predictions just day or few days ahead would not reflect the distribution/hypothesis of interest.

**Scoring in studies**: We note what the authors are claiming to predict in their abstract and introduction. We ensure that the test set in the methods and results reflects this.

0.0 – the authors create a test set is temporally aligned with the hypothesis.

0.5 – it is unclear whether the test set is temporally aligned with the hypothesis.

1.0 – the test set is explicitly not aligned with the hypothesis.

**L3.4 Geographic leakage**

**Description**: We add this as an additional category on to Kapoor & Narayanan’s framework. This error follows the same idea as the *L3.1*, where the test set does not reflect the distribution of scientific interest, but for geographies (which tend to come up a lot in industrial ecology research).

**Example:** Some authors want to predict the optimal location of a solar panel, so collect data and conduct a training and test set using just Wyoming data to do this. The paper then claims that this method can generalize to other areas (e.g. other states, other countries). Alternatively, when training a city-level geospatial model, authors can induce geospatial errors by randomly splitting geographic data into a training and test set (instead of using an approach like spatial cross-validation and isolating an entire section of the city off), ignoring geographic correlation between neighbouring samples. This can embed information about the test set in the training set which the model would not otherwise not have at deployment.

**Scoring in studies**: similar to *L3.1*, we check that geospatial models specify use of spatial cross validation, and we make sure that methods reflect scientific claims.

0.0 – the authors create a test set is geospatially aligned with the hypothesis.

0.5 – it is unclear whether the test set is geospatially aligned with the hypothesis.

1.0 – the test set is explicitly not aligned with the hypothesis and/or induces spatial autocorrelation.

**L3.2 Other nonindependence between training and test samples**

**Description**: there are other forms of non-independence which can induce leakage and make it so that the test set does not represent the authors hypothesis.

**Example:** Kapoor & Narayanan give an example: imagine a machine learning model is trying to predict the likelihood of heart attacks in new patients using heart rate data. The model is trained on 1000 heart rate readings from 200 different people. The train and test set should be segmented by people (e.g. readings from 175 people in training set, readings from 25 in the test set). If readings are randomly split, both the training and testing set could include samples from the same patient. This would invalidate the hypothesis that the model can predict heart attacked in new patients.

**Scoring in studies**: we carefully read the authors’ scientific claim (in some cases, re-writing it in our own words; e.g. “this machine learning model can do X”). We ensure the test set and results reflect this claim.

0.0 – the authors create a test set that otherwise aligns with the hypothesis.

0.5 – it is unclear whether the test set aligns with the hypothesis.

1.0 – the test set is explicitly not aligned with the hypothesis.

**L3.3 Sampling bias in test distribution**

**Description**: these are errors where the choice of test set samples does not reflect the claim or hypothesis, leading to leakage. We explicitly separate out bias geographic choices into *L3.4* above, which can constitute a form of sampling bias.

**Example:** An example given by Kapoor & Narayanan is selection bias: a paper claims to have created a machine learning model that is able to predict the likelihood of heart attack in patients across many hospitals. However, all of the patients used to train the model come from a single hospital, and the results don’t generalize to other hospitals. This leakage type is most relevant to equity issues: for example, if all of the patients used to train the model were white males, the model may not generalize well to women or people of other ethnic origins.

**Scoring in studies**: we carefully read the authors’ scientific claim (in some cases, re-writing it in our own words; e.g. “this machine learning model aims to predict X”). We ensure the test set and results reflect this claim. Verifying this error may require some consultation with a field-expert in edge cases.

0.0 – the authors create a test set that otherwise aligns with the hypothesis.

0.5 – it is unclear whether the test set aligns with the hypothesis.

1.0 – the test set is explicitly not aligned with the hypothesis.

## L4 – Results are not transparent or computationally reproducible

This is an additional error category for reproducibility. These errors do not necessarily lead to leakage, but make it impossible in some other way to reproduce, interpret, or evaluate the results of an ML model.

**L4.1** **Not computationally reproducible (hardware)**

**Description**: the computing resources used to create the model should be given. Different machines can give different training times and results, especially for deep-learning applications. If these details are not reasonably disclosed, then others cannot re-create the model, similar to how a physics or chemistry experiment might be irreproducible without the details of the lab equipment.

**Scoring in studies**: In the main body or supplementary information, we check if authors have included a statement giving hardware information, e.g. “we trained the model on a 1337 Dell laptop with a 2.51 GHz processor and Nividia GTX1776 graphics card using sklearn/pytorch/…”.

0.0 – authors give hardware information such that model is computationally reproducible.

0.5 – authors give hardware information, but it is unclear whether model is computationally reproducible.

1.0 – authors do not give hardware information.

**L4.2 Hyperparameters not given**

**Description**: the hyperparameters used to create a model (the parameters that goes into training a model, e.g. the maximum number of splits in a decision tree, the number of principle components in a PC-regression) should be given. A model cannot be exactly recreated without this info.

**Scoring in studies**: hyperparameters are model specific. We look up the type of model used for the study, and check to see if authors include a table, usually in the supplementary information, that summarizes all relevant hyperparameters of their model.

0.0 – authors give hyperparameters such that model is computationally reproducible.

0.5 – authors give hyperparameters, but it is unclear whether model is computationally reproducible.

1.0 – authors do not give hyperparameters.

**L4.3 Data not open**

**Description**: the data used to train and test the model and not reasonably available to test or download (e.g. in a Google-colab notebook, a Github repo, or a stable repository like Zenodo). While it might not be possible for some authors to release this info due to privacy concerns, we still argue that a lack of open access/intractability is a failing of reproducibility.

**Scoring in studies**: we check the “data availability” section at the bottom of the paper for this information.

0.0 – authors make data openly available and easy to access.

0.5 – authors make data available, but it is not clear if data is sufficient for reproducing results of the paper. Alternatively, the author’s specify use of a non-open, commercial dataset, but it is not clear whether this dataset would be reasonably available to other researchers for reproducibility uses.

1.0 – authors do not give open access to data for reproducibility.

**L4.4 Model not open**

**Description**: the model specifications or some version of the model (e.g. in a Google-colab notebook, a Github repo, or a stable repository like Zenodo) is not given. We consider detailed disclosure of pre-trained models as sufficient for reproducing results of a study (e.g. authors describe using a specific version of a pre-built model like XGBoost).

**Scoring in studies**: we check the “data availability” section at the bottom of the paper for this information.

0.0 – authors make the model or pre-trained details openly available and easy to access.

0.5 – authors make the model or pre-trained details available, but it is not clear if the information is sufficient for reproducing results of the paper.

1.0 – authors do not disclose pre-training details or give any open access to the model.

**L4.5 Improper metric choice**

**Description**: the metric used to evaluate a model’s performance should align with the studies hypothesis. A model which aims to classify should use proper classification metric like F1 score; a regression model should use a measure of distance like coefficient of determination. The misuse of metrics may not invalidate the numerical results of a paper, but they can invalidate claims that the hypothesis has been reproducibly addressed (e.g. a dataset with highly imbalanced classes could make it seem like the model is predicting *y* using *X*, but in reality, the model is simply always choosing the majority class).

**Scoring in studies**: in the methods, we make sure the authors explain the metric they use and justify the choice of that metric.

0.0 – authors choose an appropriate metric.

0.5 – it is unclear if the authors chose an appropriate metric, or if class imbalances could cause issues.

1.0 – the authors choose an inappropriate metric which would cause issues in reproducing the claim about the hypothesis. No metric is chosen or explained.

## Other summary statistics

In addition to the best-practice info above, we also collect other info about machine learning studies that can help us look at trends in the literature. We usually collect these before the best-practices coding of a paper in order to familiarize ourselves with the study. They include…

**Train-test split**: how is the data proportionally split between the two sets (e.g. 80/20, 70/30)?

**Sample size**: how many data samples (rows of data, number of photos) does the study use?

**Model type**: what type of model is used? We define a few categories (and choose all that are relevant)

- Regression – linear/logistic regression, principle component regression, ridge/lasso regression, non-linear regression.
- Ensemble – decision trees, random forest, gradient boosting
- Shallow – a neural network with only a single hidden layer. Authors sometimes refer to this as a “MLP (multi-layer perceptron)”.
- Deep – a neural network with more than one hidden layer. Convolution networks, RNNs, GANs, LSTM, transformers.
- Other – we include other types as they become relevant, but general limit papers outside of the core categories above. E.g. learning encoders, Bayesian models, gaussian process models.

**Data type**: what type of data is used? We define some categories that are mostly self-explanatory. A paper can fall under more than one (tabular, text, time-series, image, other).

**Features**: this is the number of features fed into the model for regressions. For tabular data, this is the number of columns. For neural networks, we calculate the number of nodes in the network.

**IE main topic**: this refers to “industrial ecology main topic”, or what topic the study is covering. This is chosen based on keywords and the discretion of the coder.

**Journal**: tracks which journal the paper is from using a unique 3-letter code.
